# Supplementary material for: Chronic exposure to TNF reprograms cell signaling pathways in fibroblast-like synoviocytes by establishing long-term inflammatory memory
Source: PubMed Central journal article supplement (PMC7679373; doi:10.1038/s41598-020-77380-9), 2020-11-20
Supplement: 41598_2020_77380_MOESM1_ESM.pdf [file 41598_2020_77380_MOESM1_ESM.pdf]

**Chronic exposure to TNF reprograms cell signaling pathways in fibroblast-like synoviocytes by establishing long-term inflammatory memory**

Umesh Gangishetti Ph.D.,<sup>1,2</sup> Sergio Ramirez-Perez Ph.D.,<sup>1,2</sup> Kyle Jones BS,<sup>1,2</sup> Abul Arif Ph.D.,<sup>1,2</sup> Hicham Drissi Ph.D.<sup>1,2,3</sup> and Pallavi Bhattaram Ph.D. <sup>1,2\*</sup>

<sup>1</sup>Department of Orthopaedics, <sup>2</sup>Department of Cell Biology, Emory University School of Medicine, Atlanta, GA 30322, USA

<sup>3</sup>Atlanta VA medical Center, 1670 Clairmont Rd, Decatur, GA 30033

\*Correspondence:

Pallavi Bhattaram ([pallavi.bhattaram@emory.edu](mailto:pallavi.bhattaram@emory.edu))

## Supplementary Material

**Supplementary Figure 1.** Scatter plots of RNA-seq data. Averaged normalized intensities from various experimental groups are presented. Green lines indicate 2-fold change.

**Supplementary Figure 2.** TNF expression levels in human and mouse FLS. (A) Averaged RPKM values of transgenic human *TNF* and endogenous mouse *Tnf* in RNA-seq from 11-week old wild type and Tg197 mice. (B) Averaged RPKM values of *TNF* gene expression in RNA-seq from normal and RAFLS.

**Table S1.** Experimental details and run accession numbers from NCBI-SRA database of the samples analyzed in this study.

**Table S2.** Expression levels (RPKM) of mSAGs in FLS from wild type control and TNF transgenic mouse Tg197.

**Table S3.** Expression levels (RPKM) of mSRGs in FLS from wild type control and TNF transgenic mouse Tg197.

**Table S4.** Expression level (RPKM) of SAGs and SRGs in human RA-FLS treated with TNF for 8h and 24h.

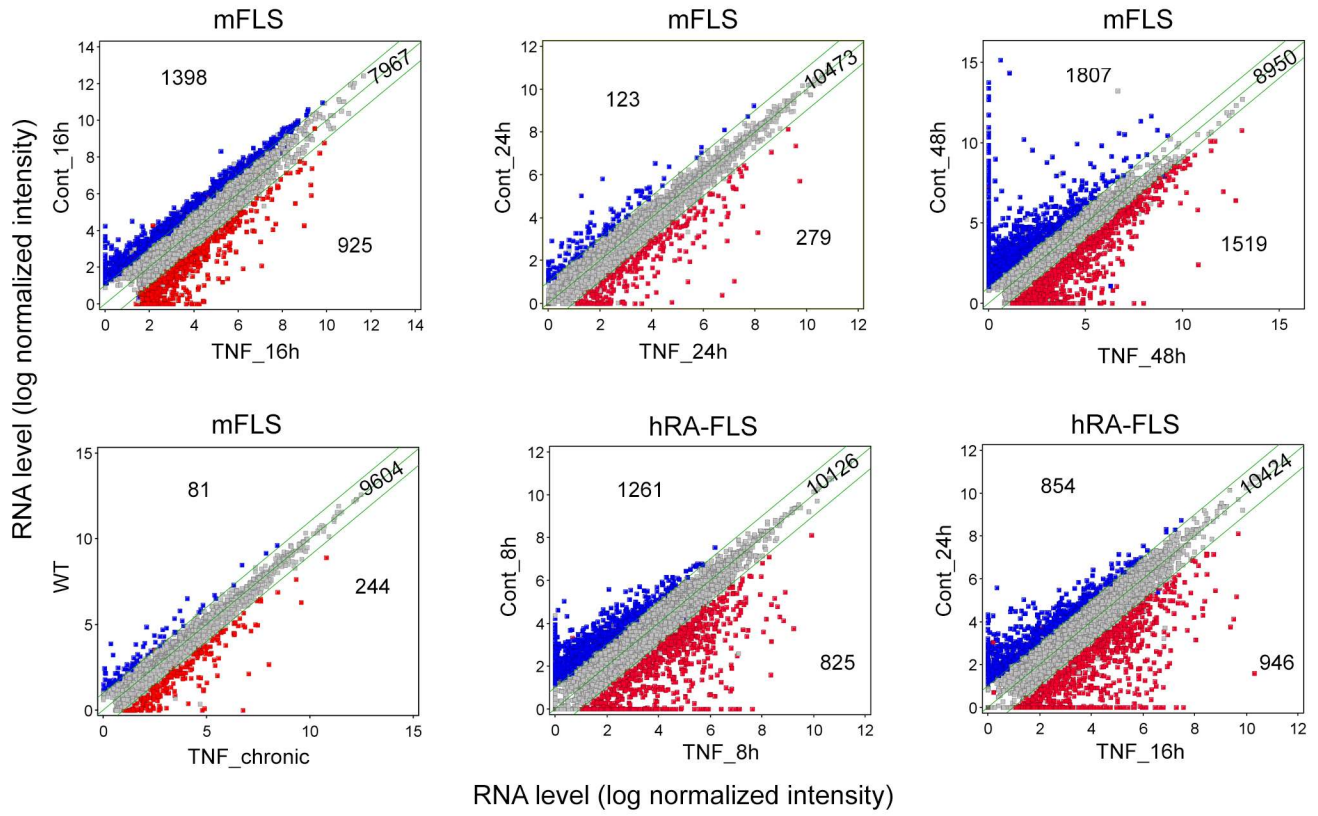

**Figure S1**

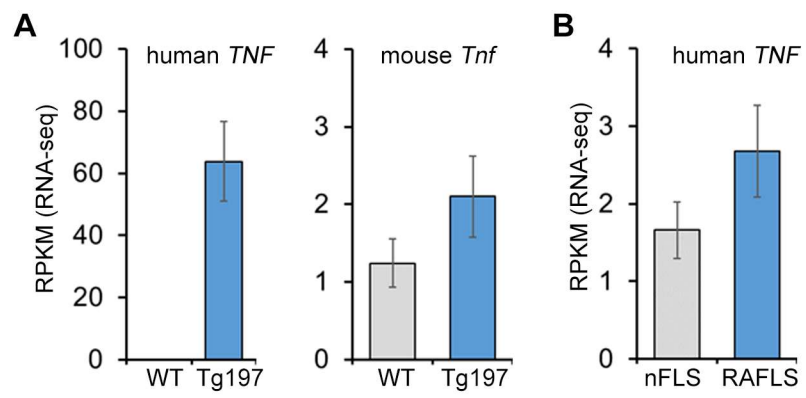

Figure S2

**Table S1. Experimental details and run accession numbers from NCBI-SRA database of the samples****RNA-seq mouse FLS**

| Sample name   | phenotype | age      | FLS passage | Run Accession | Project number |
|---------------|-----------|----------|-------------|---------------|----------------|
| WT-1          | healthy   | 11 weeks | 4-5         | SRR5279907    | PRJNA376646    |
| WT-2          | healthy   | 11 weeks | 4-5         | SRR5279908    | PRJNA376646    |
| WT-3          | healthy   | 11 weeks | 4-5         | SRR5279909    | PRJNA376646    |
| TNF chronic-1 | inflamed  | 11 weeks | 4-5         | SRR5279910    | PRJNA376646    |
| TNF chronic-2 | inflamed  | 11 weeks | 4-5         | SRR5279911    | PRJNA376646    |
| TNF chronic-3 | inflamed  | 11 weeks | 4-5         | SRR5279912    | PRJNA376646    |
| Cont 24h-1    | healthy   | 8 weeks  | 4-5         | SRR5279898    | PRJNA376646    |
| Cont 24h-2    | healthy   | 8 weeks  | 4-5         | SRR5279899    | PRJNA376646    |
| Cont 24h-3    | healthy   | 8 weeks  | 4-5         | SRR5279900    | PRJNA376646    |
| TNF 24h-1     | healthy   | 8 weeks  | 4-5         | SRR5279904    | PRJNA376646    |
| TNF 24h-2     | healthy   | 8 weeks  | 4-5         | SRR5279905    | PRJNA376646    |
| TNF24h-3      | healthy   | 8 weeks  | 4-5         | SRR5279906    | PRJNA376646    |
| Cont 48h-1    | healthy   | 13 weeks | 3           | ERR2562029    | PRJEB25978     |
| Cont 48h-2    | healthy   | 13 weeks | 3           | ERR2562031    | PRJEB25978     |
| TNF 48h-1     | healthy   | 13 weeks | 3           | ERR2561961    | PRJEB25978     |
| TNF 48h-2     | healthy   | 13 weeks | 3           | ERR2561962    | PRJEB25978     |
| Cont 16h-1    | healthy   | 8 weeks  | 4           | SAMN15430181  | PRJNA643827    |
| Cont 16h-2    | healthy   | 8 weeks  | 4           | SAMN15430182  | PRJNA643827    |
| TNF 16h-1     | healthy   | 8 weeks  | 4           | SAMN15430183  | PRJNA643827    |
| TNF 16h-2     | healthy   | 8 weeks  | 4           | SAMN15430184  | PRJNA643827    |

**DNase-seq mouse FLS**

|               |          |          |   |            |            |
|---------------|----------|----------|---|------------|------------|
| Cont 1        | healthy  | 13 weeks | 3 | ERR2561546 | PRJEB25978 |
| Cont 2        | healthy  | 13 weeks | 3 | ERR2561547 | PRJEB25978 |
| chronic TNF-1 | inflamed | 13 weeks | 3 | ERR2561540 | PRJEB25978 |
| chronic TNF-1 | inflamed | 13 weeks | 3 | ERR2561541 | PRJEB25978 |

**ATAC-seq mouse FLS**

|          |         |         |   |              |             |
|----------|---------|---------|---|--------------|-------------|
| Cont_16h | healthy | 8 weeks | 4 | SAMN15430179 | PRJNA643827 |
| TNF_16h  | healthy | 8 weeks | 4 | SAMN15430180 | PRJNA643827 |

**RNA-seq human FLS**

|                  |    |             |     |             |             |
|------------------|----|-------------|-----|-------------|-------------|
| RA FLS-1         | RA | unspecified | 4-5 | SRR11074910 | PRJNA606298 |
| RA FLS-2         | RA | unspecified | 4-5 | SRR11074917 | PRJNA606298 |
| RA FLS TNF 24h-1 | RA | unspecified | 4-5 | SRR11074915 | PRJNA606298 |
| RA FLS TNF 24h-2 | RA | unspecified | 4-5 | SRR11074922 | PRJNA606298 |
| RA FLS TNF 8h-1  | RA | unspecified | 4-5 | SRR11074913 | PRJNA606298 |
| RA FLS TNF 8h-2  | RA | unspecified | 4-5 | SRR11074920 | PRJNA606298 |

**ATAC-seq human FLS**

|                |    |             |     |            |             |
|----------------|----|-------------|-----|------------|-------------|
| RA FLS-1       | RA | unspecified | 4-6 | SRR8758524 | PRJNA528326 |
| RA FLS TNF 24h | RA | unspecified | 4-6 | SRR8758527 | PRJNA528326 |
| RA FLS TNF 72h | RA | unspecified | 4-6 | SRR8758526 | PRJNA528326 |

**Table S2. Expression levels (RPKM) of mSAGs in FLS from wildtype control and TNF transgenic mouse Tg197**

| <b>Gene Symt</b>  | <b>WT-1</b> | <b>WT-2</b> | <b>WT-3</b> | <b>TNF_chronic-1</b> | <b>TNF_chronic2-1</b> | <b>TNF_chronic-3</b> | <b>p-value( T-test)</b> |
|-------------------|-------------|-------------|-------------|----------------------|-----------------------|----------------------|-------------------------|
| <i>Abca3</i>      | 1.81        | 1.54        | 1.62        | 3.82                 | 2.80                  | 3.55                 | 0.01                    |
| <i>AC125099..</i> | 0.00        | 0.00        | 0.00        | 4.13                 | 5.25                  | 5.08                 | 0.00                    |
| <i>Acp5</i>       | 1.23        | 0.61        | 0.51        | 8.70                 | 2.96                  | 5.69                 | 0.04                    |
| <i>Adam8</i>      | 5.53        | 2.20        | 1.28        | 11.29                | 6.24                  | 8.80                 | 0.01                    |
| <i>Adamts14</i>   | 1.03        | 1.04        | 0.68        | 2.20                 | 4.43                  | 3.44                 | 0.03                    |
| <i>Adamts7</i>    | 1.76        | 1.41        | 1.25        | 8.26                 | 5.95                  | 4.84                 | 0.01                    |
| <i>Agtr1a</i>     | 13.24       | 6.95        | 12.06       | 34.45                | 20.55                 | 19.70                | 0.03                    |
| <i>Ak4</i>        | 3.64        | 2.77        | 2.08        | 9.82                 | 6.73                  | 6.67                 | 0.01                    |
| <i>Akr1b8</i>     | 15.19       | 14.50       | 11.70       | 31.58                | 29.56                 | 30.44                | 0.00                    |
| <i>Aldh1a2</i>    | 31.42       | 21.82       | 22.07       | 168.74               | 112.97                | 93.16                | 0.02                    |
| <i>Ampd3</i>      | 5.34        | 3.35        | 2.87        | 17.05                | 13.97                 | 12.07                | 0.00                    |
| <i>Apol9a</i>     | 5.88        | 3.18        | 2.98        | 11.72                | 7.76                  | 9.34                 | 0.00                    |
| <i>Ass1</i>       | 35.69       | 35.34       | 29.90       | 56.11                | 97.30                 | 93.35                | 0.04                    |
| <i>AU020206</i>   | 7.23        | 2.63        | 2.42        | 21.87                | 12.44                 | 13.55                | 0.01                    |
| <i>Bcl3</i>       | 2.33        | 0.94        | 1.01        | 11.10                | 3.96                  | 5.03                 | 0.05                    |
| <i>Birc3</i>      | 3.21        | 2.57        | 2.54        | 9.04                 | 6.96                  | 7.09                 | 0.00                    |
| <i>Bst2</i>       | 85.60       | 18.06       | 25.14       | 116.56               | 59.82                 | 75.64                | 0.01                    |
| <i>C1qb</i>       | 3.59        | 1.49        | 0.40        | 9.71                 | 6.81                  | 4.10                 | 0.01                    |
| <i>C1s1</i>       | 28.42       | 17.80       | 16.41       | 112.74               | 69.23                 | 38.83                | 0.05                    |
| <i>C3</i>         | 8.36        | 6.17        | 4.92        | 490.62               | 191.10                | 180.18               | 0.05                    |
| <i>Car9</i>       | 2.96        | 0.88        | 1.46        | 5.99                 | 2.43                  | 2.85                 | 0.03                    |
| <i>Casp1</i>      | 3.75        | 1.12        | 1.07        | 5.59                 | 3.76                  | 5.02                 | 0.02                    |
| <i>Casp4</i>      | 2.79        | 1.55        | 1.59        | 7.26                 | 5.33                  | 7.03                 | 0.01                    |
| <i>Ccl11</i>      | 0.70        | 2.14        | 0.44        | 16.51                | 28.36                 | 35.41                | 0.02                    |
| <i>Ccl2</i>       | 54.87       | 137.13      | 65.60       | 704.85               | 839.42                | 726.01               | 0.00                    |
| <i>Ccl20</i>      | 0.90        | 0.94        | 0.66        | 37.01                | 27.24                 | 20.19                | 0.01                    |
| <i>Ccl5</i>       | 1.31        | 0.34        | 0.25        | 10.10                | 7.13                  | 7.84                 | 0.00                    |
| <i>Ccl7</i>       | 136.03      | 301.34      | 184.27      | 638.86               | 704.73                | 595.16               | 0.00                    |
| <i>Ccl8</i>       | 2.31        | 0.78        | 0.55        | 16.57                | 15.18                 | 20.36                | 0.01                    |
| <i>Ccl9</i>       | 2.59        | 1.63        | 0.93        | 6.97                 | 4.54                  | 4.60                 | 0.01                    |
| <i>Cd68</i>       | 8.84        | 2.69        | 1.35        | 15.77                | 6.67                  | 6.13                 | 0.01                    |
| <i>Cd74</i>       | 1.23        | 0.26        | 0.42        | 4.46                 | 2.58                  | 4.05                 | 0.01                    |
| <i>Cdhr1</i>      | 1.23        | 0.69        | 0.86        | 5.39                 | 5.50                  | 5.41                 | 0.00                    |
| <i>Cdk6</i>       | 1.26        | 2.17        | 2.22        | 3.02                 | 4.99                  | 5.52                 | 0.01                    |
| <i>Cfb</i>        | 3.72        | 3.43        | 4.23        | 25.38                | 18.63                 | 13.87                | 0.02                    |
| <i>Cgnl1</i>      | 8.54        | 9.92        | 8.30        | 24.37                | 21.12                 | 26.14                | 0.01                    |
| <i>Ch25h</i>      | 2.05        | 4.58        | 2.88        | 27.96                | 38.03                 | 30.57                | 0.00                    |
| <i>Col18a1</i>    | 30.03       | 21.51       | 22.70       | 58.47                | 53.08                 | 56.07                | 0.00                    |
| <i>Cp</i>         | 0.78        | 0.42        | 0.61        | 5.12                 | 3.17                  | 2.59                 | 0.02                    |
| <i>Csf1r</i>      | 3.81        | 1.14        | 0.59        | 6.05                 | 1.88                  | 3.16                 | 0.04                    |
| <i>Ctsc</i>       | 1.02        | 0.93        | 0.65        | 4.02                 | 2.27                  | 1.75                 | 0.05                    |
| <i>Ctss</i>       | 1.44        | 1.29        | 0.27        | 8.41                 | 3.52                  | 5.68                 | 0.04                    |
| <i>Cxcl1</i>      | 9.33        | 11.76       | 4.81        | 28.47                | 30.19                 | 30.81                | 0.01                    |
| <i>Cxcl10</i>     | 0.62        | 0.37        | 0.12        | 3.49                 | 4.68                  | 5.25                 | 0.01                    |
| <i>Cxcl12</i>     | 58.66       | 52.39       | 62.02       | 186.23               | 123.52                | 110.89               | 0.04                    |
| <i>Cxcl16</i>     | 3.33        | 1.56        | 1.87        | 12.67                | 10.40                 | 9.63                 | 0.00                    |
| <i>Cxcl5</i>      | 75.89       | 21.41       | 18.48       | 284.31               | 134.37                | 141.22               | 0.02                    |
| <i>Cxcl9</i>      | 0.39        | 0.06        | 0.04        | 3.03                 | 2.49                  | 2.78                 | 0.00                    |
| <i>Cyba</i>       | 23.43       | 22.26       | 21.43       | 57.50                | 38.50                 | 42.84                | 0.02                    |
| <i>Cyp7b1</i>     | 6.80        | 3.38        | 4.17        | 21.65                | 12.65                 | 14.47                | 0.01                    |
| <i>Dram1</i>      | 11.24       | 9.14        | 8.36        | 44.68                | 30.10                 | 31.38                | 0.01                    |
| <i>Dtx3l</i>      | 6.29        | 1.97        | 2.39        | 8.95                 | 5.67                  | 6.75                 | 0.01                    |

|                   |        |       |       |        |        |        |      |
|-------------------|--------|-------|-------|--------|--------|--------|------|
| <i>Eccscr</i>     | 7.29   | 10.00 | 6.29  | 35.10  | 42.80  | 44.39  | 0.00 |
| <i>Egln3</i>      | 1.54   | 0.96  | 1.10  | 7.14   | 3.25   | 3.49   | 0.04 |
| <i>Enpp2</i>      | 5.08   | 1.28  | 1.89  | 26.84  | 21.33  | 39.74  | 0.02 |
| <i>Errfi1</i>     | 4.32   | 21.83 | 18.10 | 14.88  | 34.15  | 31.82  | 0.00 |
| <i>F730043M.</i>  | 0.77   | 0.57  | 0.57  | 4.80   | 3.68   | 1.60   | 0.05 |
| <i>Fabp7</i>      | 0.47   | 0.61  | 0.33  | 5.13   | 3.21   | 1.52   | 0.05 |
| <i>Fam162a</i>    | 133.41 | 75.44 | 73.28 | 282.81 | 149.95 | 171.24 | 0.02 |
| <i>Fas</i>        | 16.29  | 18.02 | 20.89 | 41.58  | 40.72  | 38.39  | 0.01 |
| <i>Fcer1g</i>     | 3.69   | 0.75  | 0.17  | 7.46   | 3.96   | 6.91   | 0.03 |
| <i>Flrt2</i>      | 12.27  | 11.97 | 10.24 | 19.14  | 24.57  | 31.50  | 0.04 |
| <i>Flrt3</i>      | 2.88   | 3.55  | 3.46  | 5.86   | 7.81   | 7.98   | 0.01 |
| <i>Foxs1</i>      | 2.64   | 7.70  | 6.85  | 8.81   | 19.39  | 13.38  | 0.02 |
| <i>Gas7</i>       | 0.87   | 0.28  | 0.37  | 3.88   | 1.84   | 2.40   | 0.02 |
| <i>Gbp2</i>       | 21.50  | 6.75  | 16.11 | 46.76  | 29.52  | 32.43  | 0.01 |
| <i>Gbp3</i>       | 9.19   | 1.73  | 3.45  | 10.58  | 7.12   | 9.33   | 0.05 |
| <i>Gm12840</i>    | 3.11   | 7.31  | 3.65  | 11.42  | 15.17  | 17.21  | 0.02 |
| <i>Gm13394</i>    | 67.14  | 14.31 | 54.58 | 149.90 | 99.07  | 91.59  | 0.02 |
| <i>Gm20547</i>    | 10.91  | 4.29  | 11.93 | 66.07  | 33.74  | 29.51  | 0.05 |
| <i>Gm26809</i>    | 14.41  | 21.06 | 16.43 | 40.15  | 36.52  | 59.95  | 0.04 |
| <i>Gm30873</i>    | 1.41   | 1.73  | 1.88  | 3.98   | 3.80   | 3.41   | 0.01 |
| <i>Gm42793</i>    | 15.42  | 11.11 | 5.84  | 57.94  | 29.25  | 29.59  | 0.03 |
| <i>Gm43302</i>    | 0.73   | 0.24  | 0.26  | 3.89   | 1.97   | 2.43   | 0.02 |
| <i>Gm45551</i>    | 0.91   | 1.02  | 1.04  | 3.28   | 2.68   | 3.91   | 0.01 |
| <i>Gm45774</i>    | 5.83   | 2.83  | 2.83  | 30.83  | 11.57  | 14.43  | 0.05 |
| <i>Grem2</i>      | 5.21   | 9.49  | 8.93  | 13.84  | 26.54  | 20.19  | 0.02 |
| <i>Gsdmd</i>      | 12.88  | 10.89 | 12.02 | 26.57  | 22.06  | 24.74  | 0.00 |
| <i>H2-D1</i>      | 56.12  | 33.54 | 36.91 | 116.67 | 80.43  | 95.24  | 0.00 |
| <i>H2-K1</i>      | 46.48  | 23.85 | 27.42 | 129.02 | 93.23  | 104.96 | 0.00 |
| <i>H2-K2</i>      | 6.70   | 3.17  | 4.75  | 11.52  | 9.95   | 7.88   | 0.02 |
| <i>H2-Q1</i>      | 3.13   | 1.54  | 2.04  | 6.37   | 5.42   | 4.48   | 0.01 |
| <i>H2-Q4</i>      | 7.63   | 2.41  | 2.84  | 31.57  | 23.58  | 24.39  | 0.00 |
| <i>H2-T23</i>     | 12.53  | 4.06  | 5.72  | 26.65  | 10.63  | 15.27  | 0.02 |
| <i>H2-T-ps</i>    | 10.88  | 4.36  | 6.98  | 24.92  | 19.84  | 16.51  | 0.01 |
| <i>Hist2h2aa2</i> | 0.00   | 0.00  | 0.00  | 3.18   | 3.84   | 3.76   | 0.00 |
| <i>Hmga1</i>      | 4.03   | 4.18  | 1.96  | 9.43   | 8.73   | 14.67  | 0.05 |
| <i>Hmga1b</i>     | 14.97  | 14.60 | 8.72  | 19.11  | 34.46  | 26.54  | 0.05 |
| <i>Hp</i>         | 6.65   | 2.28  | 4.48  | 64.49  | 41.21  | 23.87  | 0.04 |
| <i>Hpse</i>       | 1.34   | 0.58  | 0.98  | 5.12   | 2.69   | 3.45   | 0.02 |
| <i>Icam1</i>      | 3.36   | 1.58  | 2.03  | 33.85  | 27.28  | 25.62  | 0.00 |
| <i>Ifi203</i>     | 3.23   | 0.77  | 0.88  | 5.79   | 2.93   | 4.26   | 0.01 |
| <i>Ifi207</i>     | 2.35   | 0.56  | 0.52  | 3.66   | 2.29   | 2.37   | 0.00 |
| <i>Ifi2712a</i>   | 14.71  | 2.67  | 4.41  | 20.27  | 6.64   | 12.72  | 0.02 |
| <i>Ifi44</i>      | 2.80   | 2.36  | 2.57  | 10.37  | 6.31   | 8.25   | 0.02 |
| <i>Ifi47</i>      | 1.76   | 0.64  | 0.53  | 8.82   | 5.27   | 5.91   | 0.01 |
| <i>Ifit1</i>      | 8.77   | 5.48  | 7.12  | 28.21  | 23.70  | 28.44  | 0.00 |
| <i>Ifit3</i>      | 8.56   | 6.05  | 6.32  | 29.80  | 21.87  | 30.14  | 0.01 |
| <i>Ifit3b</i>     | 1.32   | 1.56  | 1.76  | 6.11   | 5.22   | 6.48   | 0.00 |
| <i>Igfbp3</i>     | 6.31   | 9.87  | 4.18  | 19.13  | 19.54  | 18.09  | 0.01 |
| <i>Iigp1</i>      | 8.88   | 1.76  | 1.71  | 14.89  | 7.99   | 9.62   | 0.00 |
| <i>Il1rl1</i>     | 36.00  | 22.26 | 11.44 | 67.33  | 82.79  | 90.66  | 0.03 |
| <i>Il4ra</i>      | 22.43  | 16.75 | 12.85 | 53.65  | 30.84  | 33.51  | 0.02 |
| <i>Irf1</i>       | 7.00   | 3.32  | 3.44  | 16.50  | 9.89   | 12.45  | 0.01 |
| <i>Irf7</i>       | 2.37   | 1.69  | 2.01  | 7.45   | 5.00   | 6.99   | 0.01 |
| <i>Irgm2</i>      | 9.94   | 3.23  | 4.77  | 12.48  | 10.78  | 14.12  | 0.04 |
| <i>Isg15</i>      | 23.51  | 8.64  | 10.86 | 52.47  | 37.28  | 46.52  | 0.00 |

|                  |       |       |       |        |        |        |      |
|------------------|-------|-------|-------|--------|--------|--------|------|
| <i>Itgb2</i>     | 1.78  | 0.46  | 0.12  | 7.41   | 5.11   | 1.74   | 0.04 |
| <i>Kalrn</i>     | 1.03  | 1.12  | 0.91  | 2.61   | 3.08   | 2.39   | 0.00 |
| <i>Kcnf1</i>     | 0.75  | 1.85  | 1.06  | 4.24   | 5.09   | 3.32   | 0.01 |
| <i>Kcnj15</i>    | 3.87  | 1.88  | 1.06  | 8.04   | 5.03   | 5.92   | 0.01 |
| <i>Krt19</i>     | 2.87  | 2.36  | 2.02  | 5.55   | 5.26   | 7.77   | 0.03 |
| <i>Laptm5</i>    | 4.26  | 0.76  | 0.29  | 10.56  | 7.49   | 6.67   | 0.00 |
| <i>Lbp</i>       | 9.01  | 10.03 | 10.74 | 50.62  | 27.37  | 24.64  | 0.05 |
| <i>Lrig1</i>     | 1.90  | 2.74  | 2.15  | 6.06   | 6.82   | 5.59   | 0.00 |
| <i>Lyz1</i>      | 0.29  | 0.23  | 0.06  | 6.78   | 3.22   | 3.37   | 0.03 |
| <i>Lyz2</i>      | 48.75 | 23.69 | 29.79 | 64.28  | 53.18  | 78.70  | 0.04 |
| <i>Mgarp</i>     | 1.70  | 0.63  | 0.72  | 6.86   | 2.32   | 2.94   | 0.05 |
| <i>Micall2</i>   | 6.60  | 5.65  | 4.96  | 12.75  | 21.17  | 17.15  | 0.03 |
| <i>Mmp13</i>     | 33.22 | 11.55 | 11.14 | 78.84  | 32.71  | 27.42  | 0.05 |
| <i>Mmp3</i>      | 6.83  | 4.53  | 2.61  | 76.97  | 89.03  | 51.24  | 0.01 |
| <i>Mmp9</i>      | 1.24  | 0.52  | 0.62  | 45.85  | 19.38  | 29.83  | 0.03 |
| <i>Mt2</i>       | 54.85 | 23.45 | 25.20 | 251.40 | 101.15 | 122.67 | 0.04 |
| <i>Ndrg2</i>     | 2.43  | 1.41  | 1.49  | 5.72   | 3.18   | 2.80   | 0.04 |
| <i>Ndufa4l2</i>  | 25.27 | 12.05 | 20.23 | 117.69 | 44.23  | 59.45  | 0.05 |
| <i>Nfkb2</i>     | 14.66 | 12.68 | 11.53 | 28.40  | 28.98  | 28.52  | 0.00 |
| <i>Nfkbia</i>    | 13.48 | 12.71 | 15.27 | 67.42  | 56.61  | 56.62  | 0.00 |
| <i>Nfkbie</i>    | 3.33  | 2.38  | 2.53  | 26.41  | 23.44  | 23.52  | 0.00 |
| <i>Ninl</i>      | 1.47  | 1.10  | 1.12  | 4.94   | 3.39   | 3.14   | 0.01 |
| <i>Npy1r</i>     | 1.98  | 1.49  | 1.38  | 19.92  | 9.62   | 7.56   | 0.05 |
| <i>Nrg1</i>      | 3.19  | 1.76  | 2.21  | 4.64   | 4.82   | 4.67   | 0.02 |
| <i>Ntn1</i>      | 3.10  | 3.89  | 4.44  | 8.52   | 10.12  | 11.02  | 0.00 |
| <i>Oasl2</i>     | 6.98  | 1.05  | 1.44  | 10.24  | 6.30   | 8.58   | 0.02 |
| <i>Parp10</i>    | 4.86  | 1.67  | 2.11  | 6.33   | 4.94   | 5.05   | 0.02 |
| <i>Parp14</i>    | 4.06  | 0.96  | 1.33  | 7.89   | 4.91   | 6.30   | 0.00 |
| <i>Pdgfb</i>     | 0.77  | 0.76  | 0.58  | 3.59   | 2.39   | 1.45   | 0.04 |
| <i>Pdk1</i>      | 6.69  | 3.27  | 4.03  | 15.04  | 7.00   | 8.03   | 0.03 |
| <i>Pdlim4</i>    | 6.02  | 5.23  | 4.88  | 20.37  | 19.74  | 17.92  | 0.00 |
| <i>Phf11d</i>    | 4.54  | 0.95  | 1.52  | 6.24   | 4.12   | 5.37   | 0.02 |
| <i>Plac8</i>     | 0.57  | 0.19  | 0.29  | 3.64   | 1.54   | 2.05   | 0.03 |
| <i>Plscr1</i>    | 5.97  | 4.51  | 4.55  | 11.97  | 11.08  | 12.23  | 0.00 |
| <i>Preli2</i>    | 4.51  | 1.62  | 2.49  | 10.78  | 4.99   | 5.37   | 0.03 |
| <i>Psmb10</i>    | 7.10  | 4.24  | 5.41  | 13.51  | 11.23  | 13.22  | 0.00 |
| <i>Psmb8</i>     | 4.17  | 1.38  | 1.73  | 9.92   | 5.91   | 6.78   | 0.00 |
| <i>Ptges</i>     | 11.23 | 9.51  | 10.85 | 26.15  | 18.98  | 20.04  | 0.01 |
| <i>Ptgir</i>     | 2.23  | 1.54  | 1.52  | 9.07   | 4.59   | 6.30   | 0.02 |
| <i>Rab20</i>     | 1.02  | 1.45  | 1.11  | 2.32   | 3.19   | 2.33   | 0.01 |
| <i>Rarres2</i>   | 1.85  | 1.01  | 2.19  | 7.50   | 3.21   | 6.96   | 0.03 |
| <i>Rbp1</i>      | 1.38  | 2.07  | 1.14  | 4.59   | 3.64   | 3.18   | 0.02 |
| <i>Relb</i>      | 4.17  | 3.42  | 4.27  | 11.08  | 11.47  | 12.82  | 0.00 |
| <i>Rhbdf2</i>    | 1.05  | 0.75  | 0.57  | 3.59   | 3.34   | 3.57   | 0.00 |
| <i>Ripk2</i>     | 9.57  | 11.09 | 9.33  | 22.38  | 28.60  | 25.49  | 0.00 |
| <i>Rnd1</i>      | 1.90  | 7.46  | 6.23  | 10.01  | 14.60  | 12.15  | 0.00 |
| <i>Rnf150</i>    | 2.98  | 1.79  | 2.15  | 7.24   | 4.53   | 4.62   | 0.01 |
| <i>Rnf213</i>    | 2.57  | 3.39  | 3.41  | 11.22  | 8.80   | 11.05  | 0.01 |
| <i>Rps18</i>     | 3.08  | 2.02  | 3.07  | 21.59  | 15.50  | 41.66  | 0.05 |
| <i>Rrad</i>      | 3.14  | 1.94  | 2.16  | 9.55   | 7.25   | 6.81   | 0.00 |
| <i>Rtp4</i>      | 17.02 | 3.50  | 4.77  | 19.96  | 13.12  | 16.71  | 0.05 |
| <i>S1pr3</i>     | 20.52 | 15.18 | 18.79 | 48.99  | 46.12  | 44.93  | 0.00 |
| <i>Saa3</i>      | 0.73  | 0.60  | 0.32  | 167.74 | 88.70  | 58.75  | 0.04 |
| <i>Sema4b</i>    | 2.16  | 1.30  | 1.47  | 3.26   | 3.27   | 3.61   | 0.02 |
| <i>Serpina3f</i> | 0.43  | 0.20  | 0.31  | 3.07   | 2.47   | 2.33   | 0.00 |



|                  |        |        |        |         |         |         |      |
|------------------|--------|--------|--------|---------|---------|---------|------|
| <i>Serpina3g</i> | 8.75   | 5.57   | 4.57   | 51.84   | 39.55   | 36.57   | 0.00 |
| <i>Serpina3h</i> | 1.80   | 0.84   | 7.96   | 12.15   | 15.72   | 21.65   | 0.01 |
| <i>Serpina3i</i> | 0.33   | 0.35   | 3.74   | 11.70   | 8.09    | 11.35   | 0.01 |
| <i>Slc16a3</i>   | 10.90  | 6.26   | 5.16   | 27.63   | 14.95   | 14.93   | 0.02 |
| <i>Slc2a6</i>    | 1.60   | 1.04   | 0.88   | 4.85    | 4.86    | 5.84    | 0.01 |
| <i>Slc43a2</i>   | 1.66   | 1.41   | 1.38   | 4.28    | 3.99    | 3.34    | 0.00 |
| <i>Slco2a1</i>   | 4.70   | 2.60   | 3.53   | 12.95   | 13.83   | 16.77   | 0.01 |
| <i>Slfn2</i>     | 1.29   | 0.25   | 0.03   | 5.09    | 2.84    | 5.19    | 0.02 |
| <i>Slfn5</i>     | 4.35   | 1.70   | 3.63   | 8.05    | 7.10    | 8.86    | 0.01 |
| <i>Sod2</i>      | 10.44  | 10.00  | 9.91   | 30.21   | 20.31   | 18.79   | 0.03 |
| <i>Spp1</i>      | 774.26 | 514.29 | 267.71 | 2980.36 | 1315.36 | 1398.40 | 0.04 |
| <i>Stx11</i>     | 1.78   | 1.27   | 1.28   | 3.49    | 2.59    | 2.96    | 0.00 |
| <i>Syt13</i>     | 0.25   | 0.50   | 0.46   | 2.72    | 3.46    | 2.37    | 0.01 |
| <i>Tapbp</i>     | 51.29  | 24.67  | 32.66  | 96.09   | 71.05   | 83.05   | 0.00 |
| <i>Tgm2</i>      | 2.09   | 1.63   | 1.36   | 12.91   | 7.41    | 4.71    | 0.05 |
| <i>Tlr2</i>      | 5.67   | 3.79   | 4.16   | 18.03   | 12.93   | 13.55   | 0.00 |
| <i>Tmem176a</i>  | 19.51  | 14.85  | 12.08  | 60.03   | 45.44   | 41.46   | 0.01 |
| <i>Tmem176b</i>  | 37.75  | 29.59  | 24.76  | 108.20  | 86.88   | 79.80   | 0.00 |
| <i>Tnfaip3</i>   | 0.49   | 0.63   | 0.50   | 5.81    | 6.90    | 6.68    | 0.00 |
| <i>Tnip1</i>     | 11.00  | 8.80   | 9.60   | 36.75   | 28.65   | 27.12   | 0.01 |
| <i>Traf3</i>     | 3.56   | 3.71   | 3.54   | 7.27    | 7.64    | 8.20    | 0.00 |
| <i>Trex1</i>     | 14.57  | 6.53   | 7.92   | 20.24   | 18.73   | 22.12   | 0.03 |
| <i>Tspan11</i>   | 0.31   | 0.46   | 0.31   | 3.07    | 2.08    | 2.37    | 0.01 |
| <i>Tyrobp</i>    | 1.74   | 1.20   | 0.35   | 5.67    | 2.66    | 6.19    | 0.05 |
| <i>Ube2l6</i>    | 13.12  | 5.42   | 8.41   | 31.00   | 20.21   | 20.58   | 0.01 |
| <i>Uchl1</i>     | 0.97   | 1.35   | 1.57   | 3.94    | 4.49    | 3.04    | 0.02 |
| <i>Ugt1a7c</i>   | 3.05   | 1.27   | 1.49   | 12.44   | 9.52    | 11.48   | 0.00 |
| <i>Vcam1</i>     | 35.50  | 18.70  | 23.19  | 69.15   | 45.78   | 47.59   | 0.00 |
| <i>Vegfc</i>     | 4.18   | 5.02   | 3.40   | 11.30   | 11.51   | 9.36    | 0.00 |
| <i>Wfdc17</i>    | 1.21   | 0.86   | 0.49   | 7.90    | 4.28    | 2.82    | 0.04 |
| <i>Xaf1</i>      | 2.37   | 1.54   | 2.10   | 6.25    | 4.83    | 6.45    | 0.00 |
| <i>Zbp1</i>      | 1.85   | 0.35   | 0.33   | 5.93    | 2.75    | 3.39    | 0.01 |

**Table S3. Expression levels (RPKM) of mSRGs in FLS from wild type control and TNF transgenic mouse Tg197**

| <b>Gene Symbol</b> | <b>WT-1</b> | <b>WT-2</b> | <b>WT-3</b> | <b>TNF_chronic-1</b> | <b>TNF_chronic2-1</b> | <b>TNF_chronic-3</b> | <b>p-value (T-test)</b> |
|--------------------|-------------|-------------|-------------|----------------------|-----------------------|----------------------|-------------------------|
| <i>Alpl</i>        | 12.29       | 6.11        | 5.79        | 3.52                 | 3.17                  | 1.62                 | 0.05                    |
| <i>Apoe</i>        | 7.02        | 6.89        | 7.59        | 4.39                 | 2.07                  | 1.75                 | 0.02                    |
| <i>Arxes1</i>      | 2.83        | 4.29        | 3.57        | 1.78                 | 1.90                  | 1.54                 | 0.02                    |
| <i>Asic3</i>       | 7.86        | 4.44        | 4.87        | 1.41                 | 2.72                  | 1.13                 | 0.05                    |
| <i>Atp12a</i>      | 25.83       | 17.95       | 6.09        | 10.33                | 3.29                  | 1.90                 | 0.04                    |
| <i>Bmp4</i>        | 48.76       | 72.84       | 94.71       | 26.13                | 29.23                 | 20.60                | 0.04                    |
| <i>Bmp5</i>        | 5.05        | 3.57        | 4.78        | 2.16                 | 1.15                  | 1.30                 | 0.01                    |
| <i>C1qtnf3</i>     | 23.60       | 42.76       | 41.55       | 6.01                 | 3.10                  | 4.08                 | 0.02                    |
| <i>Cdsn</i>        | 26.87       | 17.64       | 36.71       | 5.45                 | 7.24                  | 9.57                 | 0.03                    |
| <i>Chrdl1</i>      | 4.99        | 4.88        | 9.15        | 1.35                 | 1.93                  | 2.57                 | 0.03                    |
| <i>Cilp</i>        | 88.48       | 81.83       | 106.37      | 68.15                | 35.37                 | 32.82                | 0.05                    |
| <i>Clec14a</i>     | 5.87        | 7.01        | 7.23        | 2.93                 | 2.80                  | 2.25                 | 0.01                    |
| <i>Coch</i>        | 15.56       | 26.46       | 13.60       | 1.39                 | 4.03                  | 4.53                 | 0.03                    |
| <i>Col14a1</i>     | 18.17       | 20.73       | 33.43       | 8.82                 | 10.51                 | 10.93                | 0.04                    |
| <i>Comp</i>        | 498.60      | 507.04      | 738.05      | 331.53               | 166.63                | 174.56               | 0.04                    |
| <i>Dlk1</i>        | 3.93        | 1.70        | 3.50        | 0.94                 | 0.76                  | 1.76                 | 0.04                    |
| <i>Efs</i>         | 2.68        | 3.45        | 4.57        | 0.98                 | 1.18                  | 0.79                 | 0.03                    |
| <i>Egfl6</i>       | 36.52       | 38.04       | 49.87       | 18.81                | 9.80                  | 6.64                 | 0.03                    |
| <i>Eln</i>         | 31.14       | 65.50       | 90.96       | 13.12                | 12.96                 | 12.64                | 0.05                    |
| <i>Fbln7</i>       | 3.99        | 3.66        | 6.54        | 1.16                 | 1.00                  | 0.72                 | 0.03                    |
| <i>Frzb</i>        | 5.76        | 3.77        | 5.07        | 3.06                 | 2.11                  | 1.74                 | 0.02                    |
| <i>Fzd8</i>        | 19.65       | 32.95       | 44.45       | 11.01                | 11.60                 | 11.71                | 0.05                    |
| <i>G0s2</i>        | 4.79        | 2.40        | 3.05        | 1.73                 | 0.86                  | 0.69                 | 0.02                    |
| <i>Galnt9</i>      | 12.05       | 10.30       | 25.24       | 2.09                 | 0.88                  | 0.76                 | 0.05                    |
| <i>Gzmc</i>        | 26.41       | 31.02       | 9.34        | 9.12                 | 7.95                  | 4.04                 | 0.05                    |
| <i>Gzmd</i>        | 10.25       | 6.72        | 6.17        | 2.73                 | 2.77                  | 1.33                 | 0.02                    |
| <i>Id4</i>         | 16.92       | 20.48       | 28.36       | 7.88                 | 7.98                  | 6.88                 | 0.03                    |
| <i>Igfbp2</i>      | 155.01      | 598.45      | 482.09      | 61.82                | 187.87                | 98.79                | 0.05                    |
| <i>Igfbp4</i>      | 852.70      | 575.96      | 963.70      | 466.50               | 278.10                | 293.57               | 0.03                    |
| <i>Kazald1</i>     | 2.78        | 4.92        | 4.72        | 2.05                 | 1.48                  | 1.71                 | 0.05                    |
| <i>Kcnab1</i>      | 3.39        | 3.62        | 2.91        | 1.46                 | 1.71                  | 1.50                 | 0.00                    |
| <i>Kcne4</i>       | 9.61        | 10.05       | 15.01       | 5.71                 | 2.41                  | 2.19                 | 0.04                    |
| <i>Kcnk2</i>       | 6.39        | 7.30        | 10.27       | 1.95                 | 2.79                  | 2.00                 | 0.02                    |
| <i>Lgr5</i>        | 22.10       | 31.03       | 41.78       | 10.10                | 6.64                  | 8.42                 | 0.03                    |
| <i>Limch1</i>      | 5.46        | 5.38        | 8.18        | 1.91                 | 2.22                  | 1.56                 | 0.03                    |
| <i>Lmcd1</i>       | 55.52       | 54.40       | 71.67       | 24.30                | 29.83                 | 21.05                | 0.02                    |
| <i>Mab21l1</i>     | 3.85        | 3.74        | 2.55        | 1.35                 | 1.13                  | 1.16                 | 0.02                    |
| <i>Matn4</i>       | 2.23        | 3.90        | 4.00        | 0.84                 | 0.35                  | 0.47                 | 0.03                    |
| <i>Megf6</i>       | 12.58       | 5.53        | 9.36        | 5.03                 | 2.59                  | 3.21                 | 0.03                    |
| <i>Mest</i>        | 99.71       | 79.08       | 97.33       | 17.30                | 16.25                 | 16.69                | 0.00                    |
| <i>Mid2</i>        | 5.03        | 6.14        | 7.89        | 3.06                 | 2.84                  | 2.37                 | 0.04                    |
| <i>Mkx</i>         | 3.22        | 6.64        | 6.24        | 2.34                 | 2.58                  | 2.74                 | 0.05                    |
| <i>Ndnf</i>        | 7.32        | 8.08        | 13.48       | 3.74                 | 4.59                  | 4.87                 | 0.05                    |
| <i>Nell2</i>       | 5.25        | 7.90        | 10.87       | 2.21                 | 4.21                  | 3.07                 | 0.04                    |
| <i>Palmd</i>       | 4.60        | 12.05       | 14.52       | 1.26                 | 1.29                  | 1.61                 | 0.04                    |
| <i>Pappa</i>       | 30.42       | 19.35       | 22.15       | 15.74                | 11.32                 | 7.38                 | 0.02                    |
| <i>Pcp4l1</i>      | 23.56       | 17.03       | 13.44       | 3.76                 | 5.13                  | 2.76                 | 0.02                    |
| <i>Plagl1</i>      | 16.46       | 10.64       | 13.66       | 8.64                 | 5.79                  | 5.77                 | 0.01                    |
| <i>Ptn</i>         | 55.52       | 26.61       | 35.30       | 15.50                | 10.07                 | 18.19                | 0.04                    |
| <i>Ptprd</i>       | 1.80        | 2.84        | 3.13        | 0.96                 | 1.46                  | 1.24                 | 0.02                    |
| <i>Rgs4</i>        | 30.38       | 91.74       | 70.87       | 15.88                | 42.24                 | 26.81                | 0.04                    |
| <i>Ror1</i>        | 4.68        | 5.40        | 7.68        | 3.12                 | 2.88                  | 2.70                 | 0.05                    |

|                 |        |        |        |        |       |       |      |
|-----------------|--------|--------|--------|--------|-------|-------|------|
| <i>Scg2</i>     | 7.06   | 8.13   | 10.62  | 1.12   | 0.23  | 0.24  | 0.01 |
| <i>Sfrp1</i>    | 185.02 | 145.35 | 151.88 | 145.35 | 55.27 | 42.47 | 0.03 |
| <i>Smad9</i>    | 3.00   | 2.69   | 3.50   | 1.45   | 1.49  | 1.34  | 0.01 |
| <i>Sox9</i>     | 14.92  | 8.57   | 10.01  | 2.97   | 4.34  | 5.05  | 0.05 |
| <i>Sp7</i>      | 4.67   | 1.35   | 3.54   | 0.97   | 0.49  | 0.48  | 0.05 |
| <i>Sparcl1</i>  | 5.36   | 5.57   | 4.98   | 2.54   | 1.49  | 2.13  | 0.01 |
| <i>St8sia2</i>  | 7.88   | 6.51   | 11.49  | 2.43   | 3.23  | 2.71  | 0.03 |
| <i>Tbxa2r</i>   | 10.59  | 9.97   | 16.09  | 6.39   | 5.15  | 5.18  | 0.05 |
| <i>Tmtc1</i>    | 3.94   | 3.56   | 4.13   | 1.14   | 0.74  | 0.42  | 0.00 |
| <i>Tnfrsf21</i> | 3.58   | 4.87   | 3.49   | 1.68   | 2.16  | 1.38  | 0.01 |
| <i>Wwc1</i>     | 2.85   | 2.92   | 3.14   | 1.24   | 1.80  | 0.99  | 0.02 |

**Table S4. Expression level (RPKM) of SAGs and SRGs in human RA-FLS treated with TNF for 8h and 24h****hSAGs**

| <b>Gene Symbol</b> | <b>RA-FLS-1</b> | <b>RA-FLS-1</b> | <b>TNF_8h-RA FLS-1</b> | <b>TNF_8h-RA FLS-2</b> | <b>TNF_24h-RA FLS-1</b> | <b>TNF_24h-RA FLS-2</b> |
|--------------------|-----------------|-----------------|------------------------|------------------------|-------------------------|-------------------------|
| <i>ASS1</i>        | 51.99           | 48.24           | 92.31                  | 89.13                  | 103.08                  | 98.49                   |
| <i>BCL3</i>        | 11.42           | 9.05            | 26.07                  | 21.08                  | 23.30                   | 21.68                   |
| <i>BIRC3</i>       | 6.66            | 7.28            | 53.88                  | 60.22                  | 58.86                   | 59.56                   |
| <i>BST2</i>        | 0.22            | 0.42            | 60.53                  | 54.83                  | 154.50                  | 160.06                  |
| <i>C3</i>          | 33.16           | 30.11           | 72.18                  | 66.41                  | 103.70                  | 101.09                  |
| <i>CCL13</i>       | 0.98            | 1.20            | 5.88                   | 5.51                   | 8.76                    | 9.34                    |
| <i>CCL5</i>        | 2.59            | 3.49            | 337.86                 | 316.80                 | 1283.76                 | 1270.39                 |
| <i>CCL7</i>        | 0.58            | 0.27            | 4.97                   | 5.69                   | 2.60                    | 3.38                    |
| <i>CD68</i>        | 21.63           | 21.65           | 38.85                  | 34.15                  | 56.05                   | 52.31                   |
| <i>CD74</i>        | 4.69            | 4.22            | 32.38                  | 29.12                  | 69.98                   | 65.60                   |
| <i>CDK6</i>        | 5.63            | 6.85            | 20.58                  | 22.36                  | 14.41                   | 14.52                   |
| <i>CFB</i>         | 25.29           | 23.62           | 144.69                 | 143.48                 | 318.78                  | 309.82                  |
| <i>CH25H</i>       | 3.51            | 3.52            | 52.99                  | 53.27                  | 60.36                   | 57.84                   |
| <i>CXCL10</i>      | 0.07            | 0.07            | 128.98                 | 146.64                 | 109.92                  | 112.06                  |
| <i>CXCL16</i>      | 16.27           | 15.05           | 31.56                  | 26.87                  | 43.81                   | 42.14                   |
| <i>CXCL2</i>       | 0.39            | 0.73            | 19.20                  | 21.05                  | 20.81                   | 18.48                   |
| <i>CXCL6</i>       | 2.90            | 3.12            | 75.30                  | 78.37                  | 86.78                   | 90.48                   |
| <i>CXCL9</i>       | 0.00            | 0.06            | 40.48                  | 42.75                  | 35.04                   | 33.60                   |
| <i>CYP7B1</i>      | 0.11            | 0.14            | 7.89                   | 8.51                   | 4.64                    | 5.19                    |
| <i>DTX3L</i>       | 11.79           | 13.15           | 78.19                  | 83.19                  | 70.00                   | 74.08                   |
| <i>FAS</i>         | 22.29           | 25.44           | 61.99                  | 62.82                  | 52.21                   | 54.82                   |
| <i>GBP4</i>        | 0.28            | 0.34            | 120.40                 | 125.28                 | 66.53                   | 66.59                   |
| <i>GSDMD</i>       | 8.07            | 6.30            | 19.00                  | 15.03                  | 18.95                   | 19.03                   |
| <i>HLA-B</i>       | 80.35           | 68.38           | 195.55                 | 175.30                 | 362.24                  | 355.11                  |
| <i>IFIT3</i>       | 18.45           | 20.86           | 403.07                 | 422.44                 | 325.94                  | 318.66                  |
| <i>IRF1</i>        | 5.03            | 5.37            | 60.84                  | 58.08                  | 39.11                   | 40.62                   |
| <i>NFKB2</i>       | 16.86           | 14.72           | 62.93                  | 51.96                  | 68.79                   | 66.32                   |
| <i>NFKBIA</i>      | 24.71           | 25.65           | 120.33                 | 117.22                 | 117.16                  | 116.95                  |
| <i>NFKBIE</i>      | 7.70            | 7.61            | 63.57                  | 54.07                  | 61.76                   | 60.94                   |
| <i>NTN1</i>        | 2.23            | 1.78            | 7.45                   | 6.48                   | 16.12                   | 15.69                   |
| <i>PARP10</i>      | 9.82            | 6.85            | 38.80                  | 29.47                  | 38.16                   | 36.99                   |
| <i>PARP14</i>      | 10.18           | 11.61           | 123.54                 | 131.51                 | 83.02                   | 82.92                   |
| <i>PDK1</i>        | 0.94            | 1.11            | 2.75                   | 3.18                   | 2.29                    | 2.39                    |
| <i>PLSCR1</i>      | 6.33            | 6.78            | 61.78                  | 66.31                  | 54.62                   | 54.43                   |
| <i>PSMB8</i>       | 27.40           | 27.16           | 78.20                  | 73.08                  | 73.20                   | 72.83                   |
| <i>PTGES</i>       | 25.94           | 23.87           | 96.64                  | 88.46                  | 121.58                  | 110.50                  |
| <i>PTGIR</i>       | 3.97            | 3.53            | 21.05                  | 18.90                  | 21.11                   | 23.26                   |
| <i>RAB20</i>       | 2.20            | 2.69            | 7.26                   | 6.24                   | 7.94                    | 7.88                    |
| <i>RELB</i>        | 10.75           | 10.02           | 43.39                  | 34.83                  | 49.38                   | 47.29                   |
| <i>RHBDF2</i>      | 1.84            | 1.67            | 8.84                   | 8.14                   | 15.79                   | 15.56                   |
| <i>RIPK2</i>       | 10.38           | 10.91           | 70.21                  | 68.53                  | 56.05                   | 55.82                   |
| <i>RTP4</i>        | 2.68            | 1.66            | 37.42                  | 40.02                  | 43.16                   | 45.85                   |
| <i>SLC16A3</i>     | 10.20           | 9.01            | 15.25                  | 12.53                  | 20.73                   | 19.50                   |
| <i>SLC2A6</i>      | 2.38            | 2.63            | 37.46                  | 29.95                  | 57.32                   | 56.87                   |
| <i>SLC43A2</i>     | 2.12            | 1.66            | 17.79                  | 14.88                  | 5.49                    | 5.34                    |
| <i>SLCO2A1</i>     | 0.09            | 0.07            | 3.49                   | 3.77                   | 20.30                   | 20.51                   |
| <i>SLFN5</i>       | 21.61           | 24.64           | 48.90                  | 51.80                  | 38.20                   | 39.45                   |
| <i>TAPBP</i>       | 43.94           | 41.08           | 123.31                 | 116.11                 | 137.38                  | 131.05                  |
| <i>TGM2</i>        | 7.20            | 8.56            | 9.79                   | 7.80                   | 20.64                   | 21.00                   |
| <i>TLR2</i>        | 0.04            | 0.00            | 9.69                   | 10.97                  | 18.20                   | 18.62                   |

|                |       |       |        |        |        |        |
|----------------|-------|-------|--------|--------|--------|--------|
| <i>TNFAIP3</i> | 12.04 | 13.82 | 176.49 | 177.00 | 154.64 | 145.74 |
| <i>TNIP1</i>   | 23.64 | 22.37 | 80.66  | 73.53  | 66.84  | 63.21  |
| <i>UBE2L6</i>  | 32.87 | 31.96 | 93.97  | 86.26  | 117.58 | 107.46 |
| <i>VCAM1</i>   | 27.97 | 30.63 | 313.15 | 350.90 | 165.32 | 161.07 |
| <i>VEGFC</i>   | 37.46 | 37.25 | 96.67  | 89.88  | 91.20  | 87.04  |
| <b>hSRGs</b>   |       |       |        |        |        |        |
| <i>COL14A1</i> | 87.68 | 85.87 | 67.28  | 63.94  | 40.04  | 39.29  |
| <i>KAZALD1</i> | 40.50 | 35.84 | 21.23  | 18.48  | 13.16  | 13.25  |
| <i>MEST</i>    | 26.79 | 27.81 | 13.43  | 15.46  | 7.24   | 9.05   |
| <i>BMP4</i>    | 23.36 | 22.64 | 2.54   | 11.66  | 6.56   | 5.68   |
| <i>ID4</i>     | 7.57  | 7.88  | 2.69   | 2.38   | 2.39   | 1.60   |
| <i>SMAD9</i>   | 8.61  | 8.11  | 0.95   | 1.19   | 1.19   | 1.10   |
